# Supplementary material for: Permanganate/Bisulfite Pre-Oxidation of Natural Organic Matter Enhances Nitrogenous Disinfection By-Products Formation during Subsequent Chlorination
Source: MDPI journal article supplement (doi:10.3390/w14030507), 2022-02-08
Supplement: s1 [file s1]

Supplementary material  
for

**Permanganate/bisulfite pre-oxidation of natural organic matter  
enhances nitrogeneous disinfection by-products formation during  
subsequent chlorination**

Shu He <sup>a,c</sup>, Nanqi Ren <sup>a,b\*</sup>

*<sup>a</sup> School of Environment, Harbin Institute of Technology, Haerbin 150090, China*

*<sup>b</sup> State Key Laboratory of Urban Water Resource and Environment, School of Civil  
and Environmental Engineering, Harbin Institute of Technology (Shenzhen), Shenzhen,  
518055, China*

*<sup>c</sup> Shenzhen Yuchi Testing Technology Co., LTD, Shenzhen 518055, China*

\* Corresponding authors.

*E-mail: rnq@hit.edu.cn*

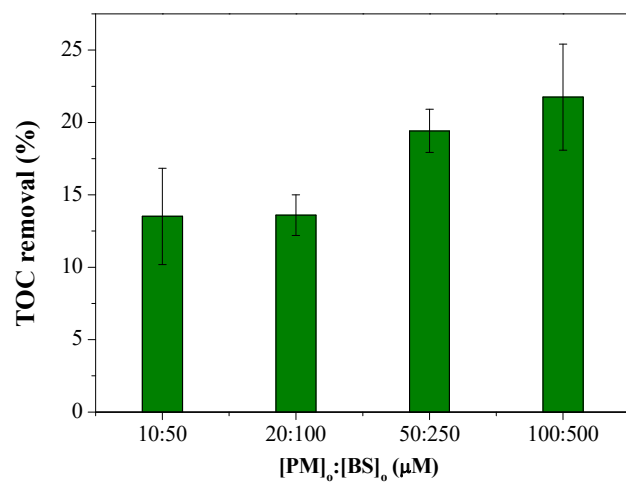

**Figure S1.** TOC removal obtained from different doses of PM and BS. ( $[HA]_0 = 3 \text{ mg L}^{-1}$ ,  $t = 30$  min, and  $[PM]_0:[BS]_0 = 10:50\text{--}100:500 \text{ }\mu\text{M}:\mu\text{M}$ ).

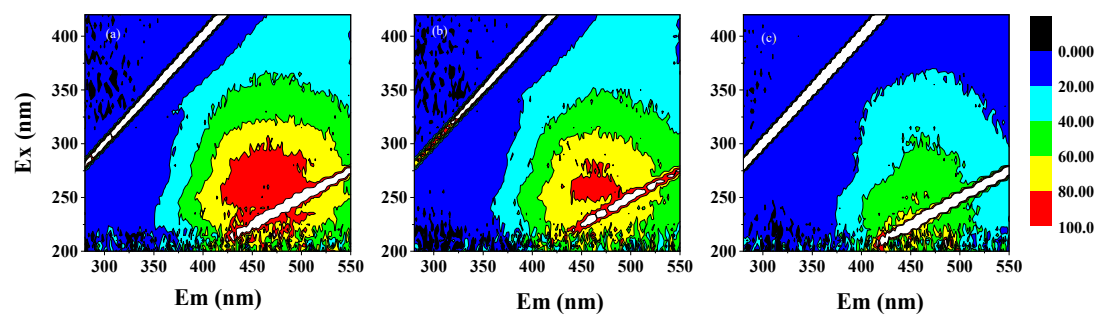

**Figure S2.** The fluorescence excitation-emission matrices in different systems. (a) HA, (b) HA/PM, (c) HA/PM/BS. ( $[\text{HA}]_0 = 3 \text{ mg L}^{-1}$ ,  $[\text{PM}]_0 = 50 \text{ }\mu\text{M}$ ,  $[\text{BS}]_0 = 250 \text{ }\mu\text{M}$ , and  $t = 30 \text{ min}$ ).

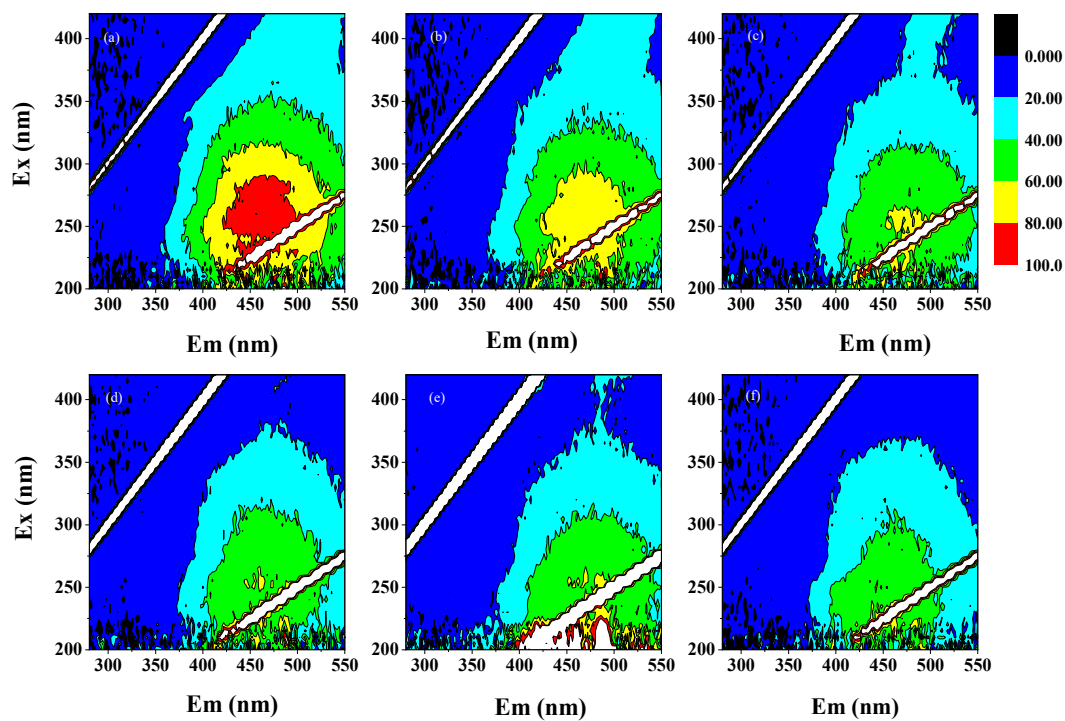

**Figure S3.** The fluorescence excitation–emission matrices in different molar ratio of PM and BS.

(a) 1:0, (b) 1:1, (c) 1:2, (d) 1:4, (e) 1:5, and (f) 1:10. ( $[\text{HA}]_0 = 3 \text{ mg L}^{-1}$ ,  $[\text{PM}]_0 : [\text{BS}]_0 = 1:0\text{--}1:10$ ).
